# Supplementary material for: Putative cancer stem cells may be the key target to inhibit cancer cell repopulation between the intervals of chemoradiation in murine mesothelioma
Source: Springer Nature journal article supplement (doi:10.1186/s12885-018-4354-1), 2018-04-27
Supplement: MOESM1 [file 15725446]

## Supplementary data

**Supplementary figure 1. Expression of CSC-associated genes up-regulated in AB12 and RN5 cells after cisplatin treatment or radiation.** Both AB12 and RN5 cells ( $5 \times 10^6$  cells/petri dish) were treated with cisplatin (1  $\mu$ g/ml and 5  $\mu$ g/ml) or with  $\gamma$ -ray radiation (5 or 15 Gy). Total RNA was isolated for qRT-PCR. Genes of interest were selected based on the literature to determine genes likely associated with mesothelioma stem cells. A) AB12 cells, B) RN5 cells. Data were analyzed from 3 independent experiments. The ratio of each gene to the house-keeping gene GAPDH is reported as mean  $\pm$  SD. \*  $P < 0.05$ , \*\*  $P < 0.01$ , \*\*\*  $P < 0.001$ .

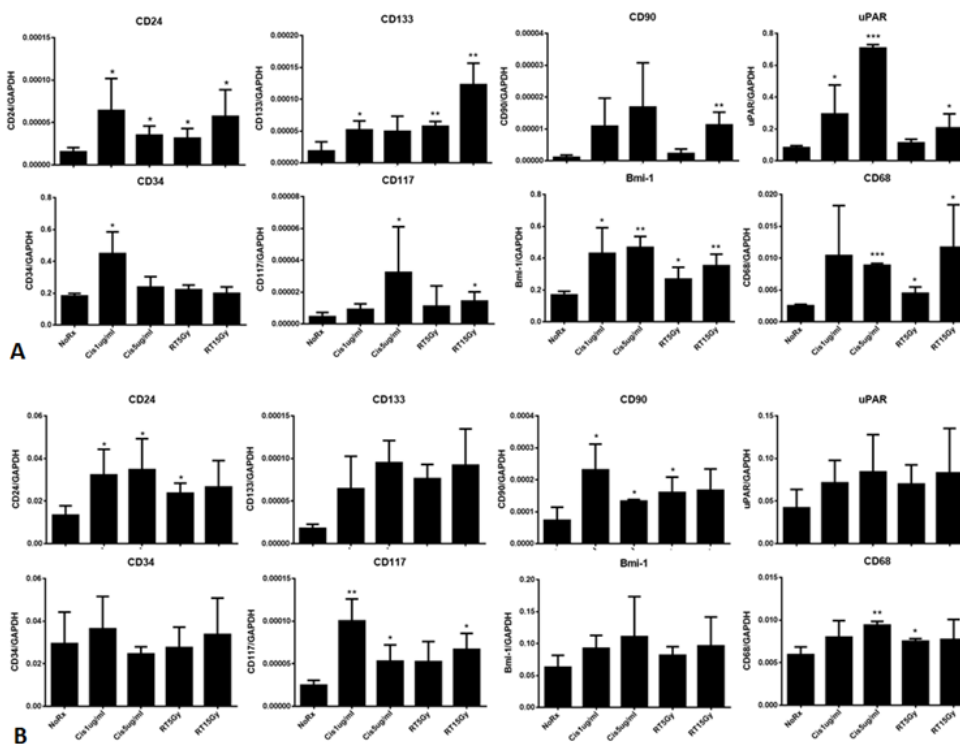

**Supplementary figure 2. Tumor-associated macrophages may share the common properties with mesothelioma stem cells.** A) Peritoneal lavage cells derived from mice at 4 weeks after i.p. injection of  $4 \times 10^6$  RN5 cells, express high level of pan macrophage marker F4/80, Tnfsf18 and Sca-1 (Ly6a) determined by flow cytometry; B) Both RN5-EOS-Puro2 cells and peritoneal lavage cells express high levels of F4/80 and Tnfsf18.

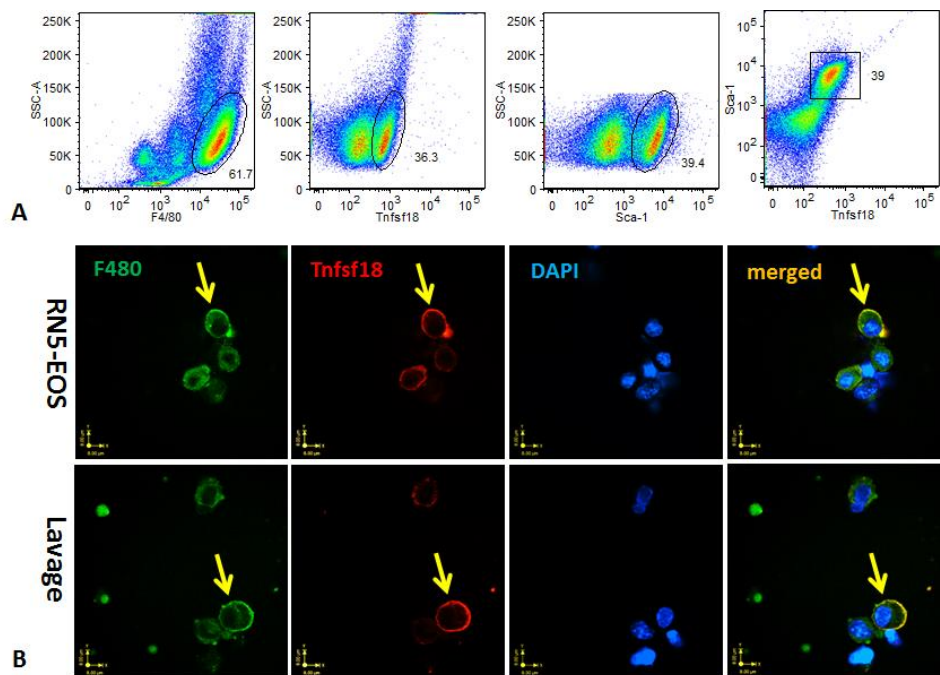

**Supplementary figure 3. *In vitro* assay of tumor-specific T cell proliferation determined by flow cytometry.** Compared with naïve mice, splenocytes derived from RN5 tumor-bearing mice had a significantly higher rate of T cell proliferation (evidenced by Ki67) after overnight treatment with or without pulsation of lysates. Pulsation with RN5-EOS-Puro2 (MSC-enriched) lysates induced similar T cell activation as bulk RN5 cell lysates (A); Pulsation with lysates resulted in significant increase of T cell proliferation compared with the splenocytes of naïve (N) mice (B).

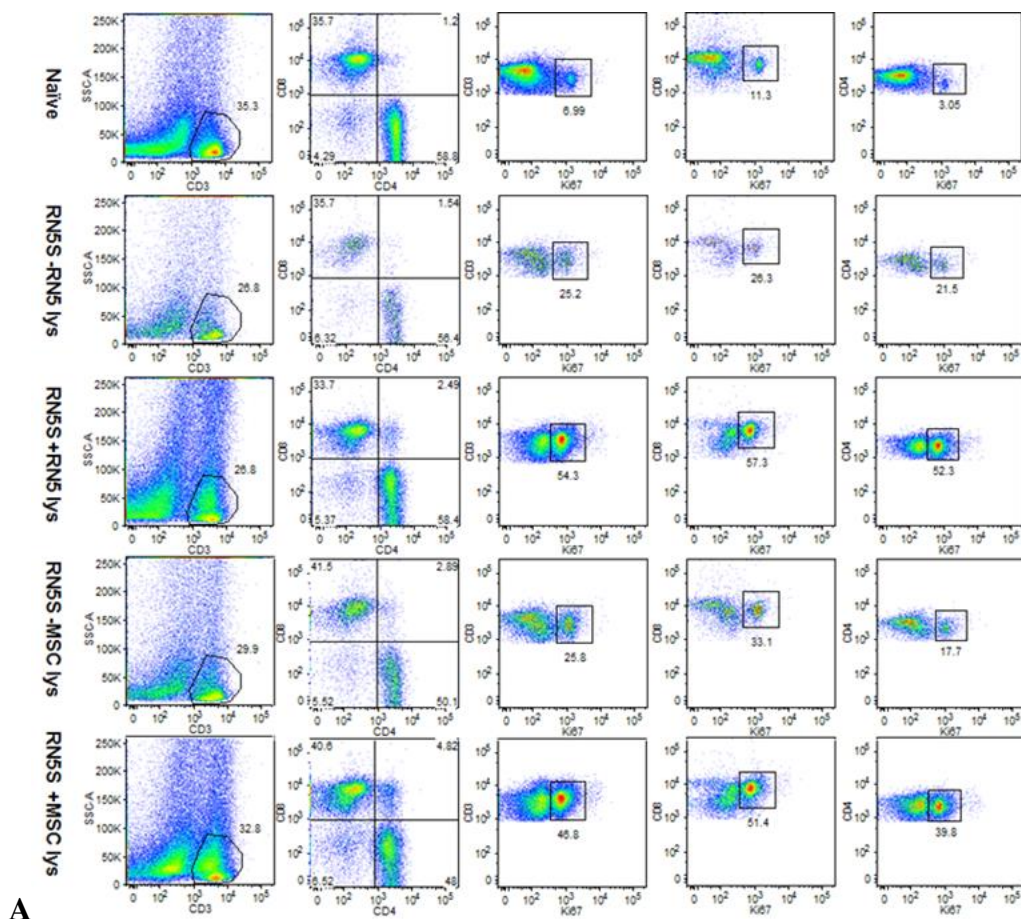

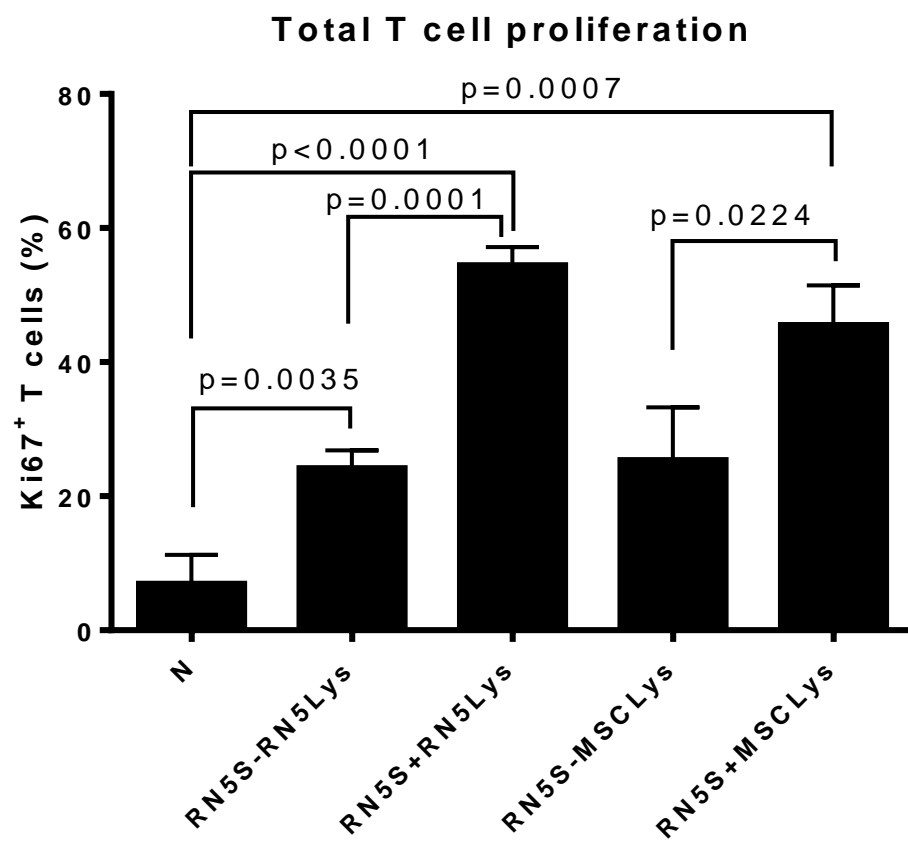

B

**Supplementary Table 1** The selected gene list with 2 or more fold change in comparison with untreated RN5 cells

| Gene Symbol          | RefSeq             | p-value  | Fold-Change | p-value  | Fold-Change | p-value  | Fold-Change |
|----------------------|--------------------|----------|-------------|----------|-------------|----------|-------------|
|                      |                    | NoRx/Cis | NoRx/Cis    | NoRx/RT  | NoRx/RT     | NoRx/MSC | NoRx/MSC    |
| <b>Nppb</b>          | NM_001287348       | 5.08E-11 | 3.46728     | 2.30E-10 | 2.79787     | 6.41E-11 | 3.34607     |
| <b>Serpib9b</b>      | NM_011452          | 2.11E-11 | 7.67504     | 4.44E-09 | 2.83068     | 5.74E-12 | 11.0156     |
| <b>A530046M15Rik</b> | NR_046131          | 3.59E-10 | 6.20579     | 1.92E-08 | 3.0176      | 4.53E-08 | 2.69278     |
| <b>Ccl5</b>          | NM_013653          | 4.35E-11 | 5.94997     | 3.15E-08 | 2.17664     | 4.24E-10 | 3.81883     |
| <b>Gm6502</b>        | XM_006535306       | 3.84E-07 | 2.09144     | 4.12E-08 | 2.6695      | 3.77E-07 | 2.09516     |
| <b>Gm6502</b>        | XM_006535306       | 5.46E-07 | 2.05338     | 5.97E-08 | 2.60074     | 3.17E-07 | 2.16338     |
| <b>Fam71f1</b>       | NM_001289663       | 2.13E-10 | 4.37838     | 6.99E-08 | 2.03488     | 8.71E-09 | 2.52306     |
| <b>Ly6a</b>          | NM_001271416       | 5.71E-09 | 2.65776     | 7.65E-08 | 2.02012     | 1.18E-08 | 2.44015     |
| <b>Tnfrsf18</b>      | NM_183391          | 1.23E-08 | 2.73531     | 7.66E-08 | 2.22059     | 2.43E-10 | 5.2116      |
| <b>Csf2</b>          | NM_009969          | 2.97E-09 | 16.6869     | 8.47E-08 | 6.29559     | 6.88E-06 | 2.8256      |
| <b>Sprr1a</b>        | NM_009264          | 1.83E-09 | 5.27875     | 1.48E-07 | 2.59303     | 2.72E-08 | 3.26421     |
| <b>LOC625240</b>     | XM_889788          | 1.24E-06 | 2.534       | 2.17E-07 | 3.20489     | 6.67E-07 | 2.73901     |
| <b>Nr4a1</b>         | NM_010444          | 9.09E-09 | -3.09293    | 2.18E-07 | -2.12424    | 4.73E-10 | -5.15002    |
| <b>Gm6509</b>        | ENSMUST00000098286 | 1.23E-06 | 2.3137      | 2.45E-07 | 2.80923     | 6.85E-07 | 2.47126     |
| <b>Spp1</b>          | NM_001204201       | 5.81E-09 | 3.66073     | 6.17E-07 | 2.0451      | 1.66E-07 | 2.3338      |
| <b>Ngf</b>           | NM_013609          | 2.31E-08 | 3.53783     | 6.70E-07 | 2.27235     | 3.79E-07 | -2.41958    |
| <b>Igfbp5</b>        | NM_010518          | 1.46E-09 | -6.62552    | 7.52E-07 | -2.34755    | 7.72E-07 | -2.34047    |
| <b>Ccl17</b>         | NM_011332          | 1.07E-09 | 12.4757     | 8.79E-07 | 2.92424     | 1.77E-06 | 2.66352     |
| <b>Pglyrp3</b>       | NM_207247          | 3.09E-08 | 3.07909     | 1.13E-06 | 2.03019     | 5.24E-08 | 2.86256     |
| <b>Gm7982</b>        | XM_006535314       | 1.70E-05 | 2.00772     | 1.61E-06 | 2.595       | 9.86E-06 | 2.11711     |
| n/a                  | ---                | 3.01E-05 | 2.79469     | 2.65E-06 | 4.15228     | 3.61E-06 | 3.92296     |
| <b>Gm7982</b>        | XM_006535314       | 2.29E-05 | 2.07099     | 2.94E-06 | 2.60858     | 2.18E-05 | 2.08136     |
| <b>Gm6502</b>        | XM_006535306       | 1.40E-05 | 2.6015      | 3.15E-06 | 3.20966     | 1.80E-05 | 2.51963     |
| <b>Gm26870</b>       | ENSMUST00000181957 | 2.25E-06 | 5.59193     | 4.82E-06 | 4.74211     | 2.06E-08 | 23.272      |
| <b>Btg2</b>          | NM_007570          | 2.68E-08 | -4.24088    | 6.20E-06 | -2.04276    | 1.84E-07 | -3.09487    |
| <b>Mmp13</b>         | NM_008607          | 2.84E-07 | 3.24736     | 9.89E-06 | 2.09489     | 1.07E-05 | 2.07884     |
| <b>Prl2c2</b>        | NM_031191          | 1.03E-05 | 3.60772     | 3.07E-05 | 3.0223      | 4.98E-08 | 13.0249     |
| <b>Crabp2</b>        | NM_007759          | 8.57E-07 | 3.3316      | 3.54E-05 | 2.08081     | 1.37E-06 | 3.10186     |
| <b>Gm7963</b>        | ENSMUST00000165454 | 0.000327 | 2.80353     | 4.50E-05 | 3.94076     | 6.01E-05 | 3.73136     |
| n/a                  | ---                | 0.000178 | -4.2179     | 0.000103 | 4.7464      | 6.51E-06 | 9.73731     |
| <b>Gm19654</b>       | AK051476           | 5.41E-07 | -4.43468    | 0.00011  | -2.07142    | 1.51E-05 | -2.61073    |
| <b>Gm22188</b>       | ENSMUST00000179875 | 0.00026  | 4.56155     | 0.000184 | 4.93439     | 0.00054  | 3.89279     |
| <b>LOC102635721</b>  | XR_382369          | 4.68E-06 | 3.20511     | 0.000196 | 2.0036      | 1.04E-05 | 2.84972     |
| <b>Prl2c3</b>        | NM_011118          | 5.34E-05 | 2.39988     | 0.000227 | 2.0375      | 8.57E-08 | 7.74848     |
| <b>Gm25225</b>       | ENSMUST00000158197 | 0.000108 | -3.04738    | 0.000402 | -2.50503    | 0.00032  | -2.58729    |
| <b>Gm24382</b>       | ENSMUST00000122698 | 1.54E-05 | -3.76435    | 0.000611 | -2.18732    | 0.000173 | -2.57417    |
| <b>Ly6c2</b>         | NM_001099217       | 2.03E-05 | 3.70679     | 0.000625 | 2.22595     | 0.000231 | 2.53427     |
| <b>LOC624931</b>     | XM_006536388       | 0.002918 | 2.50379     | 0.000905 | 3.04692     | 0.003713 | 2.41022     |
| <b>Gm23862</b>       | ENSMUST00000180342 | 0.000467 | 2.79083     | 0.001033 | 2.4768      | 0.00196  | 2.26291     |
| n/a                  | ---                | 0.000146 | -3.26686    | 0.001702 | -2.25179    | 9.71E-06 | -5.60768    |
| <b>LOC625240</b>     | XM_889788          | 0.006632 | 2.30924     | 0.001945 | 2.832       | 0.0067   | 2.30549     |

**Supplementary table 2** Selected genes of potential murine mesothelioma stem cells overlapped with human gene signature profiling (GSEA)

| <b>Entrez Gene ID</b> | <b>Gene Symbol</b> | <b>Gene Description</b>                               |
|-----------------------|--------------------|-------------------------------------------------------|
| <b>4803</b>           | NGF                | Nerve growth factor (beta polypeptide)                |
| <b>4879</b>           | NPPB               | Natriuretic peptide B                                 |
| <b>6361</b>           | CCL17              | Chemokine (C-C motif) ligand 17                       |
| <b>1437</b>           | CSF2               | Colony stimulating factor 2 (granulocyte-macrophage)  |
| <b>6696</b>           | SPP1               | Secreted phosphoprotein 1                             |
| <b>1382</b>           | CRABP2             | Cellular retinoic acid binding protein 2              |
| <b>6698</b>           | SPRR1A             | Small proline-rich protein 1A                         |
| <b>6352</b>           | CCL5               | Chemokine (C-C motif) ligand 5                        |
| <b>8995</b>           | TNFSF18            | Tumor necrosis factor (ligand) superfamily, member 18 |
| <b>4322</b>           | MMP13              | Matrix metalloproteinase 13 (collagenase 3)           |
| <b>114771</b>         | PGLYRP3            | Peptidoglycan recognition protein 3                   |
| <b>84691</b>          | FAM71F1            | Family with sequence similarity 71, member F1         |
| <b>84875</b>          | PARP10             | Poly (ADP-ribose) polymerase family, member 10        |

**Supplementary table 3** GO signaling pathways associated with the selected 41 genes

| <b>Pathway</b>                                          | <b>FDR*</b> |
|---------------------------------------------------------|-------------|
| GO:0090066_regulation_of_anatomical_structure_size      | 0.006421    |
| GO:0048588_developmental_cell_growth                    | 0.010192    |
| GO:0009617_response_to_bacterium                        | 0.01004     |
| GO:0032846_positive_regulation_of_homeostatic_process   | 0.007571    |
| GO:0043069_negative_regulation_of_programmed_cell_death | 0.0055      |
| GO:0048545_response_to_steroid_hormone_stimulus         | 0.005667    |
| GO:0060548_negative_regulation_of_cell_death            | 0.00815     |

\*FDR: False discovery rate. FDR<0.01
